1 Word count: 3873  
2 Abstract word count: 254  
3 Keywords: 05  
4 Number of references:39  
5 Number of tables: 05  
6 Number of figures: 00  
7

8 **Perception of the consumption of legal and illegal substances in the Honduran**  
9 **population.**

10 Eleonora Espinoza-Turcios<sup>1,2\*</sup>, Carlos Antonio Sosa-Mendoza<sup>2,3</sup>, Lysien Ivania  
11 Zambrano<sup>1,4</sup>, Henry Noel Castro Ramos<sup>1</sup>, José Armada<sup>3</sup>, Christian R. Mejia.<sup>4</sup>

12 **Affiliations:**

13  
14 <sup>1</sup> Faculty of Medical Sciences (FCM), National Autonomous University of Honduras  
15 (UNAH). Tegucigalpa, Honduras.

16 <sup>2</sup> Grupo de Salud Mental, Faculty of Medical Sciences (FCM).

17 <sup>3</sup> Honduran Institute for the Prevention of Alcoholism, Drug Addiction and Drug  
18 Dependency (IHADFA) Tegucigalpa, Honduras.

19 <sup>4</sup> Grupo de investigacion GRINVAR.

20 <sup>5</sup> Faculty of Business Sciences, Universidad Continental, Huancayo, Peru.

21 <sup>6</sup> Universidad de Huánuco. Huánuco, Peru.

22

23 \* **Corresponding authors:** Eleonora Espinoza Turcios  
24 [eleonora.espinoza@unah.edu.hn](mailto:eleonora.espinoza@unah.edu.hn), Faculty of Medical Sciences (FCM), Edificio CM1,  
25 FCM, Calle La Salud, next to Hospital Escuela, Tegucigalpa, M. D.C., Honduras, C.A.  
26 Postal Code: 11101.



28 **Abstract**

29 **Introduction:** Substance use affects physical health, mental health, causes social,  
30 economic damage in their family environment and society. In recent decades this has  
31 changed. **Aim:** To determine the perception of the consumption of legal and illegal  
32 substances and related factors in the general Honduran population. **Methodology:**  
33 Analytical cross-sectional study, through an active search, the information was provided  
34 by a suitable informant  $\geq 18$  years of age, both sexes. Direct questions were asked about  
35 consumption, this was associated to influential variables, through descriptive and  
36 analytical statistics. Results: Of the 3309 participants distributed nationally, When  
37 multivariate analysis was performed, it was found that there was a greater perception of  
38 problematic drug use when there was a history of previous violence (aPR: 1.53; 95%CI:  
39 1.22-1.92; p-value<0.001), if cannabis had been consumed in the last quarter (aPR:  
40 1.29; 95%CI: 1.05-1.58; p-value=0.016), if she stopped doing what was expected (aPR :  
41 7.05; 95%CI: 5.00-9.95; p-value<0.001) or if she worried a friend or family member  
42 (aPR: 1.49; 95%CI: 1.20-1.86; p-value<0.001), on the contrary, there was less concern  
43 among those with university studies (aPR: 0.70; 95%CI: 0.49-0.99; p-value=0.048),  
44 adjusted for six variables. **Discussion:** An association was found between the  
45 perception of problematic substance use according to sex, academic grade, history of  
46 previous violence, use of tobacco, cannabis, cocaine, opioids, hallucinogens, whether  
47 the person stopped doing what was expected, whether a friend or relative was  
48 concerned, or whether the person injected. **Conclusion:** The most reported legal  
49 substance of use among the Honduran population was tobacco, followed by marijuana  
50 and cocaine among illegal substances.

51 **Keywords:** Tobacco Use, Substance Abuse Screening, Domestic Violence, Honduras.

52

## 53 **Introduction:**

54           About 284 million people aged 15-64 years used drugs worldwide in 2020,  
55 according to the World Drug Report - 2022, an increase of 26% over the previous  
56 decade, young people are using more drugs than ever before. In Africa and Latin  
57 America, people under 35 years of age account for the majority of those receiving  
58 treatment for drug use disorders (UNODC, 2022). Substance use, such as alcohol,  
59 tobacco, and illicit drugs, has been associated with serious health problems and is  
60 estimated annually to account for 12% of all deaths worldwide (Malaguti et al., 2020).

61           A 2017 systematic analysis of the global burden of disease shows the largest  
62 relative sex differences in 2017 included substance use disorders 3018 cases per 100  
63 000 in men vs 1400 per 100 000 in women, and interpersonal violence 3265 vs 5643,  
64 respectively (Sofi-Mahmudi et al., 2021).

65           According to the World Health Organization (WHO), hazardous use (hazardous  
66 drinking) is a pattern of substance use that increases the risk of harmful consequences  
67 for the user. Some authors limit these consequences to physical and mental, others also  
68 include social consequences (World Health Organization, 1994).

69           Conditions of poverty, social inequality and violence have exacerbated the  
70 problem of substance use as an escape mechanism in Honduras. Although occasional  
71 research has been carried out in the past, no recent studies have been conducted in  
72 specific communities or in high-risk captive populations. According to a review  
73 conducted by the Honduran Institute for the Prevention of Alcoholism, Drug Addiction  
74 and Drug Dependency (IHADFA) on drug use in Honduras, it was concluded that the  
75 age of onset of substance use has decreased in children, starting at an earlier age. In

76 addition, there is an increase in the prevalence of lifetime use and a significant  
77 percentage of young people continue to use. Although illicit drug use is still below the  
78 average for the general population, in the homes of these young people there is a high  
79 consumption of drugs, mainly alcohol and tobacco, especially by the father figure  
80 (“Consumo de drogas en Honduras,” 2001). In view of this situation, we propose to  
81 investigate the perception of the consumption of legal and illegal substances and related  
82 factors in the general population of Honduras.

83

#### 84 **Methods**

85 A cross-sectional analytical or association study was generated, with a non-  
86 random convenience sample of 3309 participants, distributed nationally, among the  
87 inclusion criteria: informant aged  $\geq 18$  years, of both sexes, not suffering from any  
88 mental illness, giving written informed consent. Exclusion criteria included: suffering  
89 from a mental illness that made it impossible to provide information, being intoxicated  
90 or having consumed drugs during the interview. In the filtering process, 56 were  
91 eliminated because the informant was under 18 years of age, leaving a total of 3309. It  
92 should be noted that a statistical power calculation was made to determine whether the  
93 number of respondents was sufficient for the crosses made.

94 An active search for the ideal informant was carried out to try to obtain more  
95 reliable information from the consumer, since, due to the social stigma of substance use,  
96 the consumer may not give truthful information and may have a bias, the information  
97 was obtained through an interview, the recording instrument was anonymous and  
98 consisted of: 1) sociodemographic data of the informant. 2) personal background of the  
99 consumer. 3) related factors. 4) pathological antecedents of the consumer. The Alcohol,  
100 Smoking and Substance Involvement Screening Test (ASSIST), which was developed

101 by the WHO to detect the use of psychoactive substances and related problems in  
102 primary care patients, was used to prepare the addiction questions and was validated in  
103 a multicenter study conducted in Australia, Brazil, India, Thailand, the United  
104 Kingdom, Zimbabwe and the United States (“The Alcohol, Smoking and Substance  
105 Involvement Screening Test (ASSIST): manual for use in primary care,” 2010;  
106 Humeniuk et al., 2008; WHO ASSIST Working Group, 2002).

107 The ASSIST, in its version 3.0, is an eight-question instrument of brief  
108 application in the last three months that evaluates health risks and other problems  
109 associated with substance use (Soto-Brandt et al., 2014).

110

111 For the statistical analysis, first a descriptive table was created, where the  
112 measures of central tendency and dispersion were generated for the age variable, as well  
113 as the frequencies and percentages for the categorical variables. Subsequently, a couple  
114 more tables were created and the final tables were generated, where the analytical  
115 statistics were performed using generalized linear models (Poisson family, log link  
116 function, models for robust variances and with adjustment for the department of  
117 residence). In this last part, the PR (prevalence ratios), 95% confidence intervals (95%  
118 confidence intervals) and p-values were obtained; it is important to mention that the  
119 value  $p < 0.05$  was taken as a criterion for a variable to pass from the bivariate to the  
120 multivariate model, as well as for statistical significance to be considered in the final  
121 model.

122

123 The study project was approved by the Biomedical Research Ethics Committee  
124 (CEIB) of the FCM IRB 00003070, approved in the session of November 22 of 2018,  
125 with registration number: 047-2018, the Doctors in Social Service (MSS) received an

126 online course of Good Clinical Practices The Global Health Network, ([www.tghn.org](http://www.tghn.org)).  
127 In addition, it should be noted that at all times the information was safeguarded, the  
128 rights of the respondents were respected and followed the ethical guidelines for  
129 biomedical research.

## 130 **Results**

131 A total of 3309 people participated, distributed in the 18 departments of  
132 Honduras, with the highest concentration of participants in the departments of Francisco  
133 Morazán 733 (22.2%), Olancho 317 (9.6%) and Comayagua 259 (7.8%). About the  
134 people to whom respondents referred, 88.1% (2825) were men, 9.6% (316) were  
135 elderly, 55.5% (1796) lived in urban areas, 84.2% (2756) had studies up to high school  
136 and 12.5% (410) reported previous violence. Table 1

137

**Table 1.** Population characteristics, n= 3309.

| Variable              | Frequency | Percentage % |
|-----------------------|-----------|--------------|
| <b>Gender</b>         |           |              |
| Female                | 454       | 13.9         |
| Male                  | 2825      | 86.1         |
| <b>Elderly</b>        |           |              |
| No                    | 2964      | 90.4         |
| Yes                   | 316       | 9.6          |
| <b>Resides in</b>     |           |              |
| Rural                 | 1469      | 45.0         |
| Urban                 | 1796      | 55.0         |
| <b>Studies</b>        |           |              |
| Up to high school     | 2756      | 84.2         |
| University            | 519       | 15.8         |
| <b>Prior violence</b> |           |              |
| No                    | 2872      | 87.5         |
| Yes                   | 410       | 12.5         |

138

139

140 Regarding the use of legal and illegal drugs in the last quarter, 44.9% (1462) had used tobacco,

141 8.5% (276) cannabis, 3.6% (116) cocaine, 0.2% (8) opioids and 0.2% (6) hallucinogens. Table 2

142

143

**Table 2.** Use of legal and illegal drugs in the last three months, n=3309.

| Variable              | Frequency | Percentage % |
|-----------------------|-----------|--------------|
| <b>Tobacco*</b>       |           |              |
| No                    | 1792      | 55.1         |
| Yes                   | 1462      | 44.9         |
| <b>Cannabis*</b>      |           |              |
| No                    | 2960      | 91.5         |
| Yes                   | 276       | 8.5          |
| <b>Cocaine*</b>       |           |              |
| No                    | 3119      | 96.4         |
| Yes                   | 116       | 3.6          |
| <b>Opioids*</b>       |           |              |
| No                    | 3227      | 99.8         |
| Yes                   | 8         | 0.2          |
| <b>Hallucinogens*</b> |           |              |
| No                    | 3229      | 99.8         |
| Yes                   | 6         | 0.2          |

144

145

\*Consumption at least once a month during the last quarter.

146 In the last quarter 11.7% (388) had some kind of problem derived from drug use, 10.1%

147 (334) stopped doing what was expected, 41.1% (1357) worried a friend or relative,

148 28.4% (938) tried or succeeded in reducing use, and 0.6% (19) may have injected a

149 drug. Table 3

150

**Table 3.** Consequences of drug use, n= 3309.

151

| Variable              | Frequency | Percentage % |
|-----------------------|-----------|--------------|
| <b>Drug problems*</b> |           |              |



|                          |      |      |
|--------------------------|------|------|
| No                       | 2921 | 88.3 |
| Yes                      | 388  | 11.7 |
| <b>Irresponsible**</b>   |      |      |
| No                       | 2975 | 89.9 |
| Yes                      | 334  | 10.1 |
| <b>Concern±</b>          |      |      |
| No                       | 1947 | 58.9 |
| Yes                      | 1357 | 41.1 |
| <b>Tried to control£</b> |      |      |
| No                       | 2369 | 71.6 |
| Yes                      | 938  | 28.4 |
| <b>Injected#</b>         |      |      |
| No                       | 3286 | 99.4 |
| Yes                      | 19   | 0.6  |

152 \* When at least once a month in the last quarter you had some kind of problem because  
 153 of your use. \*\*When at least once a month in last trimester stopped doing what was  
 154 expected. ±Preoccupied a friend or family member in last trimester. £Tried or  
 155 succeeded in controlling, reducing or stopped using in last trimester. #May have  
 156 injected a drug in the last trimester.

157

158 When the crude analysis was performed, an association was found between the  
 159 perception of problematic drug use according to sex (p=0.004), academic grade  
 160 (p<0.001), history of previous violence (p<0.001), whether in the last quarter they had  
 161 used tobacco (p<0.001), cannabis (p<0.001), cocaine (p<0.001), opioids (p<0.001),  
 162 hallucinogens (p<0.001), stopped doing what was expected (p<0.001) or worried a  
 163 friend or relative (p<0.001) or injected (p<0.001). Table 4

164 **Table 4.** Crude analysis of factors associated with a close relative's perception of  
 165 problematic drug use in Honduras, n=3309.

| Variable | Drug use problems |          | R <sub>Pc</sub> (95%CI) p-value |
|----------|-------------------|----------|---------------------------------|
|          | No n (%)          | Si n (%) |                                 |
| Gender   |                   |          |                                 |

|                        |             |            |                          |
|------------------------|-------------|------------|--------------------------|
| Female                 | 421 (92.7)  | 33 (7.3)   | Control category         |
| Male                   | 2472 (87.5) | 353 (12.5) | 1.72 (1.19-2.48) 0.004   |
| <b>Elderly</b>         |             |            |                          |
| No                     | 2613 (88.2) | 351 (11.8) | Control category         |
| Yes                    | 279 (88.3)  | 37 (11.7)  | 0.99 (0.76-1.29) 0.934   |
| <b>Resides in</b>      |             |            |                          |
| Rural                  | 1277 (86.9) | 192 (13.1) | Control category         |
| Urban                  | 1603 (89.3) | 193 (10.7) | 0.82 (0.54-1.25) 0.361   |
| <b>Studies</b>         |             |            |                          |
| Up to high school      | 2402 (87.2) | 354 (12.8) | Control category         |
| University             | 487 (93.8)  | 32 (6.2)   | 0.48 (0.36-0.65) <0.001  |
| <b>Prior violence</b>  |             |            |                          |
| No                     | 2601 (90.6) | 271 (9.4)  | Control category         |
| Yes                    | 294 (71.7)  | 116 (28.3) | 3.00 (2.17-4.14) <0.001  |
| <b>Tobacco*</b>        |             |            |                          |
| No                     | 1625 (90.7) | 167 (9.3)  | Control category         |
| Yes                    | 1246 (85.2) | 216 (14.8) | 1.59 (1.26-1.99) <0.001  |
| <b>Cannabis*</b>       |             |            |                          |
| No                     | 2655 (89.7) | 305 (10.3) | Control category         |
| Yes                    | 199 (72.1)  | 77 (27.9)  | 2.71 (2.19-3.35) <0.001  |
| <b>Cocaine*</b>        |             |            |                          |
| No                     | 2774 (88.9) | 345 (11.1) | Control category         |
| Yes                    | 78 (67.2)   | 38 (32.8)  | 2.96 (2.08-4.22) <0.001  |
| <b>Opioids*</b>        |             |            |                          |
| No                     | 2848 (88.2) | 381 (11.8) | Control category         |
| Yes                    | 4 (66.7)    | 2 (33.3)   | 2.82 (1.10-7.28) 0.032   |
| <b>Hallucinogens*</b>  |             |            |                          |
| No                     | 2848 (88.2) | 381 (11.8) | Control category         |
| Yes                    | 5 (71.4)    | 2 (28.6)   | 2.42 (1.29-4.56) <0.001  |
| <b>Irresponsible**</b> |             |            |                          |
| No                     | 2789 (93.7) | 186 (6.3)  | Control category         |
| Yes                    | 132 (39.5)  | 202 (60.5) | 9.67 (6.53-14.32) <0.001 |

**Concern±**

|     |             |            |                         |
|-----|-------------|------------|-------------------------|
| No  | 1803 (92.6) | 144 (7.4)  | Control category        |
| Yes | 1113 (82.0) | 244 (18.9) | 2.43 (1.79-3.30) <0.001 |

**Tried to control£**

|     |             |            |                        |
|-----|-------------|------------|------------------------|
| No  | 2095 (88.4) | 274 (11.6) | Control category       |
| Yes | 824 (87.8)  | 114 (12.2) | 1.05 (0.85-1.30) 0.647 |

**Injected#**

|     |             |            |                         |
|-----|-------------|------------|-------------------------|
| No  | 2906 (88.4) | 380 (11.6) | Control category        |
| Yes | 12 (83.2)   | 7 (36.8)   | 3.19 (1.80-5.65) <0.001 |

166 \*Consumption at least once a month in the last quarter. \*\*At least once a month in last  
 167 trimester stopped doing what was expected. ±Preoccupied a friend or family member in  
 168 last trimester. £Tried or succeeded in controlling, reducing, or stopped using in last  
 169 trimester. #May have injected a drug in the last trimester. Analytical results (prevalence  
 170 ratios (95% confidence intervals) and p-values) were obtained with generalized linear  
 171 models (Poisson family, log link function and models for robust variances).

172

173 Multivariate analysis found that there was a higher perception of problematic drug use  
 174 when there was a history of previous violence (aPR: 1.53; 95%CI: 1.22-1.92; p-  
 175 value<0.001), if in the last quarter cannabis use had occurred (aPR: 1.29; 95%CI: 1.05-  
 176 1.58; p-value=0.016), if it stopped what was expected (aPR: 7.05; 95%CI: 5.00-9.95; p-  
 177 value<0.001) or if it worried a friend or family member (aPR: 1.49; 95%CI: 1.20-1.86;  
 178 p-value<0.001), in contrast, there was less worry among those with university education  
 179 (aPR: 0.70; 95%CI: 0.49-0.99; p-value=0.048), adjusted for six variables. Table 5

180 **Table 5.** Adjusted analysis of the factors associated with the perception of a close relative of  
 181 problematic drug use in Honduras.

| Variable            | RPC (95%CI) p-value     |
|---------------------|-------------------------|
| Male gender         | 1.31 (0.93-1.84) 0.119  |
| University students | 0.70 (0.49-0.99) 0.048  |
| Prior violence      | 1.53 (1.22-1.92) <0.001 |
| Tobacco*            | 1.09 (0.91-1.31) 0.354  |

|                        |                         |
|------------------------|-------------------------|
| <b>Cannabis*</b>       | 1.29 (1.05-1.58) 0.016  |
| <b>Cocaine*</b>        | 1.14 (0.98-1.32) 0.080  |
| <b>Opioids*</b>        | 1.41 (0.78-2.52) 0.253  |
| <b>Hallucinogens*</b>  | 1.58 (0.75-3.36) 0.229  |
| <b>Irresponsible**</b> | 7.05 (5.00-9.95) <0.001 |
| <b>Concerns±</b>       | 1.49 (1.20-1.86) <0.001 |
| <b>Injected#</b>       | 1.31 (0.82-2.10) 0.263  |

182

183 \*Consumption at least once a month in the last quarter. \*\*Stopped doing what was

184 expected at least once a month in the last quarter. ±Concerned a friend or family

185 member in the last quarter. #You may have injected a drug in the last trimester.

186 Analytical results (prevalence ratios (95% confidence intervals) and p-values) were

187 obtained with generalized linear models (Poisson family, log link function and models

188 for robust variances).

189

## 190 **Discussion**

191 In recent years in Honduras there has been a considerable increase in the

192 consumption of both legal and illegal substances among the population, the main

193 substances studied being alcohol and tobacco; a study in a locality in the capital of the

194 country showed a prevalence for alcoholism of 6.2% (“Mental disorders prevalence at

195 Villanueva Community, metropolitan region,” 1999) According to the National

196 Demographic and Health Survey/Multiple Indicator Cluster Survey (ENDESA/MICS

197 2019), 31% of men and 9% of women in Honduras consumed alcoholic beverages

198 during the last month. The highest percentages were in the Central District (39%), Bay

199 Islands (38%) and Colon (37%), among those in the 30-34 age group 37%, higher

200 education 42% (INSTITUTO NACIONAL DE ESTADÍSTICA, 2019). In view of this,

201 it was proposed to try to determine the perception of substance use in the Honduran  
202 population.

203 In this study, the highest concentration of participants was registered in the  
204 departments of Francisco Morazán 733 (22.2%), Olancho 317 (9.6%) and Comayagua  
205 259 (7.8%); poles of economic development and higher population density, with the  
206 most reported substances being tobacco, cannabis, cocaine, opioids and hallucinogens.  
207 This is ratified by a study of carriers in the USA in 2022, in the last three months, the  
208 substances most used or not used medically were tobacco (82%) for legal drugs, cocaine  
209 (53%) for illicit drugs and prescription opioids (67%) for prescription drugs (Tam et al.,  
210 2022)

211 Manthey et al, in an online study with a sample of 36,538 adults from 21  
212 European countries between April and July 2020, found an overall decrease in alcohol  
213 use, while cannabis and nicotine use showed increasing trends, as well as cocaine use,  
214 but to a lesser extent, while ecstasy use showed a decrease (Manthey et al., 2021). In  
215 Spain, the most prevalent drugs of abuse were alcohol, tobacco, hypnotosedatives,  
216 cannabis and cocaine (“las Toxicomanías (OEDT). Informe 2013: alcohol, tabaco y  
217 drogas ilegales en España. Madrid: Ministerio de Sanidad, Servicios Sociales e Igualdad  
218 ...,” 2015)

219 A prospective multicenter randomized study with a sample of 3,240 participants  
220 reported having used drugs in the last month, 2,084 (64.3%) were identified as having a  
221 drug use problem, with the majority of participants reporting most frequent cannabis  
222 59.9%, cocaine 18.1%, street opioids 11.2% or prescription opioids 5.6% (Macias  
223 Konstantopoulos et al., 2014).

224 As reported by Adinolfi et al, 90.86% (587) of the men and 84.55% (1478) of  
225 the women had consumed alcoholic beverages, as for illicit drug use, 58.51% (378) of  
226 the men and 42.16% (737) of the women had consumed marijuana (Adinolfi, Bezerra,  
227 Curado, Souza, & Galduróz, 2022).

228 In a systematic review the proportion of people who consumed alcohol during  
229 the COVID-19 pandemic ranged from 21.7% to 72.9%, this for general population  
230 samples, where there was higher use of other substances and ranged from 3.6% to  
231 17.5% in the general population. Mental health factors were the most common  
232 correlates or triggers for increased alcohol and other substance use (Roberts et al.,  
233 2021).

234 The abuse of new synthetic opioids is a growing problem worldwide, becoming  
235 a serious threat to the health of consumers, these new psychoactive substances can  
236 escape immunological screening tests and appropriate confirmatory methods have not  
237 yet been developed and validated (Marchei et al., 2018).

238 In general, it is reported that women drink less than men; however, the absolute  
239 number of women who drink has actually increased in the world, 51.4% of women  
240 drink alcohol in Europe, while 3.5% of women suffer from alcohol use disorder. (World  
241 Health Organization, 2018)

242

243 Honduras reports similar patterns in the consumption of substances such as  
244 tobacco, cannabis, cocaine; however, in this study we did not find a worrisome increase  
245 in alcohol consumption among the population studied; possibly because the information  
246 was obtained through a suitable informant.

247 Hondurans in this study who had prior violence had more drug use, Gilchrist et  
248 al. found that 34% of men had been violent in the past year with their current/most  
249 recent partner, violence was associated with lower education level, parents who had  
250 separated/divorced, childhood physical abuse, alcohol or cocaine use. Intimate partner  
251 violence is common among men attending substance abuse treatment (Gilchrist et al.,  
252 2015).

253 General domestic violence and its various types are prevalent in different parts  
254 of the world and factors affecting domestic violence, such as general age, age at  
255 marriage, low literacy, husband's addiction to alcohol and drugs, can be prevented  
256 through health planning; especially in these areas (Abdi, Mahmoodi, Afsahi, Shaterian,  
257 & Rahnemaei, 2021).

258 Illicit drug use is related to individual characteristics; however, social and family  
259 environments seem to be associated with this use (Instituto Brasileiro de Geografia e  
260 Estatística - IBGE e o Ministério da Saúde, 2015). Antunes reported that the overall  
261 prevalence of illicit drug use was 3.8%; 3.3% among women and 4.4% among men, and  
262 physical aggression was by family members and was also associated with illicit drug  
263 use (Antunes, Rivadeneira-Guerrero, Goulart, & Oenning, 2018).

264 Hondurans who used cannabis were also found to have a higher frequency of  
265 problematic drug use. Wilkinson et al. reported that marijuana use was significantly  
266 associated with worse outcomes on post-traumatic stress disorder (PTSD) symptom  
267 severity, violent behavior, and measures of alcohol and drug use (Wilkinson,  
268 Stefanovics, & Rosenheck, 2015).

269 A cross-sectional study using data from the Spanish Household Survey on  
270 Alcohol and Drugs (2013) found that men had higher risk consumption of alcohol and

271 cannabis, while women consumed more hypnotosedatives. The lower the level of  
272 education, the greater the gender differences in the consumption of these substances.  
273 While men with a lower level of education had higher risk consumption of alcohol and  
274 cannabis, the prevalence in women was the same. Women with a lower level of  
275 education and men with a higher level of education consumed more hypnotosedatives.  
276 Unemployment was associated with substance use in both men and women (Teixidó-  
277 Compañó et al., 2018).

278 In Europe up to 2022, an estimated 83.4 million or 29% of adults (aged 15-64)  
279 in the European Union are estimated to have ever used an illicit drug, with more men  
280 (50.5 million) than women (33 million) reporting use. Cannabis remains the most  
281 widely used substance, with more than 22 million European adults reporting having  
282 used cannabis in the past year (“Observatorio Europeo de las Drogas y las  
283 Toxicomanías,” 2019).

284 Pérez and Ruiz 2017, establish that the average age of onset of consumption of  
285 psychoactive substances such as cannabis is around nineteen years of age, which is the  
286 most prevalent drug after alcohol among the youngest (Pérez & Ruiz, 2017). According  
287 to the Colombian Drug Observatory (2016), it was documented that not only is  
288 consumption increasing, but the age of onset is decreasing (Restrepo Escobar &  
289 Sepúlveda Cardona, 2021).

290 Among Brazilian adolescents between 13 and 15 years of age, 55.5% reported  
291 alcohol consumption and 9.0% had used illicit drugs at least once in their lifetime and  
292 22% reported episodes of drunkenness (Oliveira, Campos, Andreazzi, & Malta, 2017).

293 In this study according to ASSIST, those who were more irresponsible or  
294 worried their friends or family had a higher frequency of drug use, ASSIST screening



295 and linked brief intervention as a project outcome have the potential to reduce the  
296 burden of disease associated with substance use and substance use disorders in a wide  
297 variety of countries and health care settings (Humeniuk et al., 2012). In Mexico, with a  
298 sample of 19,109 Mexicans, with an average age of 34.38 years, men reported high  
299 lifetime psychoactive substance use and levels of risky drug use. A high percentage of  
300 women aged 18-19 years reported lifetime use of tobacco and alcohol, and a large  
301 number of women of all ages reported lifetime use of sedatives and opioids (Morales-  
302 Chainé, Robles-García, Barragán-Torres, & Treviño-Santa-Cruz, 2022).

303 The legalization of cannabis in North America has increased its daily use,  
304 especially cannabis products among young adults, in people with psychiatric disorders,  
305 suicides and hospitalizations. Cocaine production reached an all-time high in 2020, up  
306 11% over 2019. Methamphetamine trafficking continues to expand geographically; 117  
307 countries reported methamphetamine seizures between 2016 and 2020. Global opium  
308 production grew by 7% between 2020 and 2021, reaching 7,930 tons. Illicit drug  
309 markets, according to the World Drug Report 2022, can have local, community or  
310 individual impacts on the environment (UNODC, 2022)

311 Mexico has reported that 43.2% of men and 32.3% of women used drugs in  
312 2021, according to the Mexican Observatory of Mental Health, during the COVID-19  
313 pandemic, 32.5% of the population reported alcohol use, 24.6% tobacco use, and 14.6%  
314 cannabis use with higher prevalence in men than in women, 16% of men and 9% of  
315 women reported using cocaine, and 16.4% of men and 9.6% of women reported using  
316 opioids during the pandemic (Observatorio Mexicano de Salud Mental y Consumo de  
317 Drogas, 2021).

318 A descriptive, cross-sectional, prevalence study to whom the PHQ-9 and the  
319 ASSIST 3.0 were applied, in which 50.7% were women with a median age of 41 years.

320 Alcohol was the substance of greatest consumption in the last 3 months with 53.7%,  
321 followed by cigarettes 47.6%, marijuana 26.7% and cocaine 14.5% (Campuzano-  
322 Cortina et al., 2021). In Rio de Janeiro-Brazil, in another study, prevalences in the last  
323 three months were detected in the male subsample for the use of tobacco 56.4%,  
324 alcoholic beverages 75.8%, cannabis 16.9% and cocaine/crack 10.1%. Religion and  
325 schooling emerge as important factors for drug use (Abreu, Parreira, Souza, & Barroso,  
326 2016).

327 In contrast, those who were university students were found to have less drug use,  
328 with Vanderbruggen et al. reporting that younger individuals with less education or  
329 those who were technically unemployed had a higher risk of increasing their alcohol  
330 and/or cigarette use during times of social isolation during the COVID-19 pandemic  
331 (Vanderbruggen et al., 2020), although other authors report that more schooling  
332 increases consumption, as reported in a study in the Norwegian population after the  
333 COVID-19 outbreak, where it was reported that the odds of daily alcohol consumption  
334 were higher for older people and among those with higher education and lower among  
335 women than among men. Daily alcohol consumption was also associated with  
336 depression and the expectation of financial loss in relation to the COVID-19 outbreak  
337 (Bonsaksen et al., 2021).

338 Early onset of consumption is directly related to dependence, in our study the  
339 onset beginning at early ages from 11 years, having higher risk of dependence in  
340 adulthood as being the group of 71-80 years, with 12.0% dependence, according to  
341 Pilatti in 2014, reported early onset of alcohol consumption and was associated with the  
342 amount of alcohol consumption, even up to dangerous levels, as well as, with tobacco  
343 and drug consumption (Pilatti, Caneto, Garimaldi, Del Vera, & Pautassi, 2014).

344 People with low socioeconomic status (SES) experience a higher risk of  
345 mortality in general and alcohol-attributable mortality in particular (Probst, Lange,  
346 Kilian, Saul, & Rehm, 2021). Poorer people suffer greater social and health harms from  
347 alcohol consumption than wealthier people (World Health Organization -, 2022)

348 **Limitations:** The present study has some limitations that should be taken into  
349 account, studying the consumption of both licit and illicit substances due to the social  
350 stigma, and therefore, consumers may not provide complete information, which is why  
351 we resorted to a suitable informant who may not know the information requested. The  
352 concentration of the population was centered in three departments, despite having a  
353 sample of all 18 departments, so the results cannot be generalized to the entire  
354 population of Honduras, but it could be an important situational analysis.

355 **Conclusions:**

356 Tobacco, followed by cannabis and in third place cocaine were the most commonly  
357 used drugs among the Honduran population in the last quarter. Those who had previous  
358 violence and those who used cannabis had more problematic drug use and those who  
359 were university students had less drug use.

360 **Author Contributions:**

361 Study design: EET, CASM, Data collection: HNCR Data analysis: LIZ, CRM, JA.  
362 Writing: EET, CASM, LIZ, HNCR, CRM, JA all authors have read and agreed to the  
363 published version of the manuscript.

364 **Funding:**

365 The current article processing charges (publication fees) were funded by the Facultad de  
366 Ciencias Médicas (FCM) (2-03-01-01), Universidad Nacional Autónoma de Honduras  
367 (UNAH), Tegucigalpa, MDC, Honduras, Central America (granted to Dra. Espinoza).

368 **Institutional Review Board Statement:**

369 The study was conducted under the Declaration of Helsinki. This research's preparation  
370 and execution fully complied with the fundamental ethical principles of autonomy,  
371 justice, beneficence, and non-maleficence. The Act Number (2018047), approved by the  
372 Ethics Committee in Biomedical Research (CEIB) of the National Autonomous  
373 University of Honduras (UNAH), meeting of 22 November 2018.

374 **Data Availability Statement:**

375 The data presented in this study are available on request from the corresponding author.

376 **Acknowledgments:**

377 To all the MSS of the March 2018 to March 2019 cohort who agreed to participate in  
378 the project, to the directors of Hospitals and Health Units of the SESAL of the areas that  
379 participated in the study, to the teachers of the UIC, for all the support provided in the  
380 review of the MSS, assigned to each one. To the memory of Dr. Dagoberto Espinoza  
381 Murra (QDG) who was part of the design of the study as an expert in the subject, to Mr.  
382 Mauricio Gonzales for the elaboration of the database.

383 **Conflicts of Interest:**

384 The authors declare no conflict of interest.

385 **References**

- 386 Abdi, F., Mahmoodi, Z., Afsahi, F., Shaterian, N., & Rahnemaei, F. A. (2021). Social  
387 determinants of domestic violence against suburban women in developing countries: A  
388 systematic review. *Obstetrics & Gynecology Science*, *64*(2), 131–142.  
389 <https://doi.org/10.5468/ogs.20211>
- 390 Abreu, A. M. M., Parreira, P. M. S. D., Souza, M. H. d. N., & Barroso, T. M. M. D. d. A. (2016).  
391 PROFILE OF CONSUMPTION OF PSYCHOACTIVE SUBSTANCES AND ITS RELATIONSHIP TO  
392 SOCIODEMOGRAPHIC CHARACTERISTICS: A CONTRIBUTION TO A BRIEF INTERVENTION IN  
393 PRIMARY HEALTH CARE, RIO DE JANEIRO, BRAZIL. *Texto & Contexto - Enfermagem*, *25*(4).  
394 <https://doi.org/10.1590/0104-07072016001450015>

- 395 Adinolfi, A. C., Bezerra, A. G., Curado, D. F., Souza, A. A. L. de, & Galduróz, J. C. F. (2022). Drug  
396 Use Frequency Variation and Mental Health During the COVID-19 Pandemic: An Online  
397 Survey. *International Journal of Mental Health and Addiction*, 20(5), 2755–2769.  
398 <https://doi.org/10.1007/s11469-021-00546-7>
- 399 *The Alcohol, Smoking and Substance Involvement Screening Test (ASSIST): manual for use in*  
400 *primary care* (2010). Retrieved from  
401 <https://apps.who.int/iris/bitstream/handle/10665/44320/9789941096556-geo.pdf>
- 402 Antunes, H. d. A., Rivadeneira-Guerrero, M. F., Goulart, B. N. G. de, & Oenning, N. S. X. (2018).  
403 Familiar factors and illicit drug use among Brazilian adolescents: An analysis of the Brazilian  
404 National Survey of School Health (PeNSE, 2015). *Cadernos De Saúde Pública*, 34(12),  
405 e00009518. <https://doi.org/10.1590/0102-311x00009518>
- 406 Bonsaksen, T., Ekeberg, Ø., Schou-Bredal, I., Skogstad, L., Heir, T., & Grimholt, T. K. (2021). Use  
407 of Alcohol and Addictive Drugs During the COVID-19 Outbreak in Norway: Associations With  
408 Mental Health and Pandemic-Related Problems. *Frontiers in Public Health*, 9, 667729.  
409 <https://doi.org/10.3389/fpubh.2021.667729>
- 410 Campuzano-Cortina, C., Feijoó-Fonnegra, L. M., Manzur-Pineda, K., Palacio-Muñoz, M.,  
411 Rendón-Fonnegra, J., Montoya, L., . . . Restrepo, D. (2021). Comorbilidad entre síntomas  
412 depresivos y consumo de sustancias en pacientes hospitalizados por enfermedades no  
413 psiquiátricas [Comorbidity between depressive symptoms and substance use in-patients  
414 hospitalized for non-psychiatric diseases]. *Revista Colombiana De Psiquiatria (English Ed.)*,  
415 50(2), 130–137. <https://doi.org/10.1016/j.rcp.2019.07.001>
- 416 *Consumo de drogas en Honduras* (2001). Retrieved from  
417 <https://revistamedicahondurena.hn/assets/uploads/vol69-2-2001.pdf#page=32>
- 418 Gilchrist, G., Blazquez, A., Segura, L., Geldschläger, H., Valls, E., Colom, J., & Torrens, M. (2015).  
419 Factors associated with physical or sexual intimate partner violence perpetration by men  
420 attending substance misuse treatment in Catalunya: A mixed methods study. *Criminal*  
421 *Behaviour and Mental Health*, 25(4), 239–257. <https://doi.org/10.1002/cbm.1958>
- 422 Humeniuk, R., Ali, R., Babor, T. F., Farrell, M., Formigoni, M. L., Jittiwutikarn, J., . . . Simon, S.  
423 (2008). Validation of the Alcohol, Smoking And Substance Involvement Screening Test  
424 (ASSIST). *Addiction*, 103(6), 1039–1047. <https://doi.org/10.1111/j.1360-0443.2007.02114.x>
- 425 Humeniuk, R., Ali, R., Babor, T., Souza-Formigoni, M. L. O., Lacerda, R. B. de [Roseli Boergen],  
426 Ling, W., . . . Vendetti, J. (2012). A randomized controlled trial of a brief intervention for  
427 illicit drugs linked to the Alcohol, Smoking and Substance Involvement Screening Test  
428 (ASSIST) in clients recruited from primary health-care settings in four countries. *Addiction*,  
429 107(5), 957–966. <https://doi.org/10.1111/j.1360-0443.2011.03740.x>
- 430 Instituto Brasileiro de Geografia e Estatística - IBGE e o Ministério da Saúde (2015). Pesquisa  
431 Nacional de Saúde do Escolar - PeNSE. Retrieved from  
432 <https://biblioteca.ibge.gov.br/visualizacao/livros/liv97870.pdf>
- 433 INSTITUTO NACIONAL DE ESTADÍSTICA (2019). ENCUESTA NACIONAL DE DEMOGRAFÍA Y  
434 SALUD / ENCUESTA DE INDICADORES MÚLTIPLES POR CONGLOMERADOS (ENDESA/MICS  
435 2019). Retrieved from [https://www.inec.gov.hk/V3/imag-doc/2021/10/Informe-ENDESA-](https://www.inec.gov.hk/V3/imag-doc/2021/10/Informe-ENDESA-MICS-2019.pdf)  
436 [MICS-2019.pdf](https://www.inec.gov.hk/V3/imag-doc/2021/10/Informe-ENDESA-MICS-2019.pdf)
- 437 *Las Toxicomanías (OEDT). Informe 2013: alcohol, tabaco y drogas ilegales en España. Madrid:*  
438 *Ministerio de Sanidad, Servicios Sociales e Igualdad ...* (2015).

- 439 Macias Konstantopoulos, W. L., Dreifuss, J. A., McDermott, K. A., Parry, B. A., Howell, M. L.,  
440 Mandler, R. N., . . . Weiss, R. D. (2014). Identifying patients with problematic drug use in the  
441 emergency department: Results of a multisite study. *Annals of Emergency Medicine*, *64*(5),  
442 516–525. <https://doi.org/10.1016/j.annemergmed.2014.05.012>
- 443 Malaguti, A., Ciocanel, O., Sani, F., Dillon, J. F., Eriksen, A., & Power, K. (2020). Effectiveness of  
444 the use of implementation intentions on reduction of substance use: A meta-analysis. *Drug*  
445 *and Alcohol Dependence*, *214*, 108120. <https://doi.org/10.1016/j.drugalcdep.2020.108120>
- 446 Manthey, J., Kilian, C., Carr, S., Bartak, M., Bloomfield, K., Braddick, F., . . . Rehm, J. (2021). Use  
447 of alcohol, tobacco, cannabis, and other substances during the first wave of the SARS-CoV-2  
448 pandemic in Europe: A survey on 36,000 European substance users. *Substance Abuse*  
449 *Treatment, Prevention, and Policy*, *16*(1), 36. <https://doi.org/10.1186/s13011-021-00373-y>
- 450 Marchei, E., Pacifici, R., Mannocchi, G., Marinelli, E., Busardò, F. P., & Pichini, S. (2018). New  
451 synthetic opioids in biological and non-biological matrices: A review of current analytical  
452 methods. *TrAC Trends in Analytical Chemistry*, *102*, 1–15.  
453 <https://doi.org/10.1016/j.trac.2018.01.007>
- 454 *Mental disorders prevalence at Villanueva Community, metropolitan region (1999).*
- 455 Morales-Chainé, S., Robles-García, R., Barragán-Torres, L., & Treviño-Santa-Cruz, C. L. (2022).  
456 Remote Screening for Alcohol, Smoking, and Substance Involvement by Sex, Age, Lockdown  
457 Condition, and Psychological Care-Seeking in the Primary Care Setting during the COVID-19  
458 Pandemic in México. *International Journal of Mental Health and Addiction*, 1–28.  
459 <https://doi.org/10.1007/s11469-022-00972-1>
- 460 *Observatorio Europeo de las Drogas y las Toxicomanías (2019).*
- 461 Observatorio Mexicano de Salud Mental y Consumo de Drogas (2021). Informe sobre la  
462 Situación de la Salud Mental y el Consumo de Sustancias Psicoactivas en México; 2021.  
463 Retrieved from [https://www.gob.mx/salud/conadic/acciones-y-programas/observatorio-](https://www.gob.mx/salud/conadic/acciones-y-programas/observatorio-mexicano-de-drogas-omd)  
464 [mexicano-de-drogas-omd](https://www.gob.mx/salud/conadic/acciones-y-programas/observatorio-mexicano-de-drogas-omd)
- 465 Oliveira, M. M. de, Campos, M. O., Andreazzi, M. A. R. de, & Malta, D. C. (2017). Características  
466 da Pesquisa Nacional de Saúde do Escolar - PeNSE [Characteristics of the National  
467 Adolescent School-based Health Survey - PeNSE, Brazil]. *Epidemiologia E Servicos De Saude*  
468 *: Revista Do Sistema Unico De Saude Do Brasil*, *26*(3), 605–616.  
469 <https://doi.org/10.5123/s1679-49742017000300017>
- 470 Pérez, E., & Ruiz, S. (2017). El consumo de sustancias como factor de riesgo para la conducta  
471 delictiva: Una revisión sistemática. *Acción Psicológica*, *14*(2), 33–50.  
472 <https://doi.org/10.5944/ap.14.2.20748>
- 473 Pilatti, A., Caneto, F., Garimaldi, J. A., Del Vera, B. V., & Pautassi, R. M. (2014). Contribution of  
474 time of drinking onset and family history of alcohol problems in alcohol and drug use  
475 behaviors in Argentinean college students. *Alcohol and Alcoholism (Oxford, Oxfordshire)*,  
476 *49*(2), 128–137. <https://doi.org/10.1093/alcac/agt176>
- 477 Probst, C., Lange, S., Kilian, C., Saul, C., & Rehm, J. (2021). The dose-response relationship  
478 between socioeconomic deprivation and alcohol-attributable mortality risk-a systematic  
479 review and meta-analysis. *BMC Medicine*, *19*(1), 268. [https://doi.org/10.1186/s12916-021-](https://doi.org/10.1186/s12916-021-02132-z)  
480 [02132-z](https://doi.org/10.1186/s12916-021-02132-z)
- 481 Restrepo Escobar, S. M., & Sepúlveda Cardona, E. A. (2021). Campañas educativas y de  
482 prevención. *Interdisciplinaria Revista De Psicología Y Ciencias Afines*, *38*(2), 199–208.  
483 <https://doi.org/10.16888/interd.2021.38.2.13>

- 484 Roberts, A., Rogers, J., Mason, R., Siriwardena, A. N., Hogue, T., Whitley, G. A., & Law, G. R.  
485 (2021). Alcohol and other substance use during the COVID-19 pandemic: A systematic  
486 review. *Drug and Alcohol Dependence*, 229(Pt A), 109150.  
487 <https://doi.org/10.1016/j.drugalcdep.2021.109150>
- 488 Sofi-Mahmudi, A., Masinaei, M., Shamsoddin, E., Tovani-Palone, M. R., Heydari, M. H.,  
489 Shoaee, S., . . . Farzadfar, F. (2021). Global, regional, and national burden and quality of  
490 care index (QCI) of lip and oral cavity cancer: A systematic analysis of the Global Burden of  
491 Disease Study 1990-2017. *BMC Oral Health*, 21(1), 558. [https://doi.org/10.1186/s12903-](https://doi.org/10.1186/s12903-021-01918-0)  
492 [021-01918-0](https://doi.org/10.1186/s12903-021-01918-0)
- 493 Soto-Brandt, G., Portilla Huidobro, R., Huepe Artigas, D., Rivera-Rei, Á., Escobar, M. J., Salas  
494 Guzmán, N., . . . Castillo-Carniglia, Á. (2014). Evidencia de validez en Chile del Alcohol,  
495 Smoking and Substance Involvement Screening Test (ASSIST) [Validity evidence of the  
496 Alcohol, Smoking and Substance Involvement Screening Test (ASSIST) in Chile]. *0214-4840*,  
497 26(4), 291–302. <https://doi.org/10.20882/adicciones.27>
- 498 Tam, C. C., Qiao, S., Garrett, C., Zhang, R., Aghaei, A., Aggarwal, A., & Li, X. (2022). Substance  
499 use, psychiatric symptoms, personal mastery, and social support among COVID-19 long  
500 haulers: A compensatory model. *MedRxiv*, 2022.11.23.22282679.  
501 <https://doi.org/10.1101/2022.11.23.22282679>
- 502 Teixidó-Compañó, E., Espelt, A., Sordo, L., Bravo, M. J., Sarasa-Renedo, A., Indave, B. I., . . .  
503 Brugal, M. T. (2018). Differences between men and women in substance use: The role of  
504 educational level and employment status. *Gaceta Sanitaria*, 32(1), 41–47.  
505 <https://doi.org/10.1016/j.gaceta.2016.12.017>
- 506 UNODC (2022). El Informe Mundial sobre las Drogas 2022 destaca las tendencias del cannabis  
507 posteriores a su legalización, el impacto ambiental de las drogas ilícitas y el consumo de  
508 drogas entre las mujeres y las personas jóvenes. Retrieved from  
509 [https://www.unodc.org/ropan/es/el-informe-mundial-sobre-las-drogas-2022-destaca-las-](https://www.unodc.org/ropan/es/el-informe-mundial-sobre-las-drogas-2022-destaca-las-tendencias-del-cannabis-posteriores-a-su-legalizacin--el-impacto-ambiental-de-las-drogas-ilcitas-y-el-consumo-de-drogas-entre-las-mujeres-y-las-personas-jvenes.html)  
510 [tendencias-del-cannabis-posteriores-a-su-legalizacin--el-impacto-ambiental-de-las-drogas-](https://www.unodc.org/ropan/es/el-informe-mundial-sobre-las-drogas-2022-destaca-las-tendencias-del-cannabis-posteriores-a-su-legalizacin--el-impacto-ambiental-de-las-drogas-ilcitas-y-el-consumo-de-drogas-entre-las-mujeres-y-las-personas-jvenes.html)  
511 [ilcitas-y-el-consumo-de-drogas-entre-las-mujeres-y-las-personas-jvenes.html](https://www.unodc.org/ropan/es/el-informe-mundial-sobre-las-drogas-2022-destaca-las-tendencias-del-cannabis-posteriores-a-su-legalizacin--el-impacto-ambiental-de-las-drogas-ilcitas-y-el-consumo-de-drogas-entre-las-mujeres-y-las-personas-jvenes.html)
- 512 Vanderbruggen, N., Matthys, F., van Laere, S., Zeeuws, D., Santermans, L., van den Aemele, S.,  
513 & Crunelle, C. L. (2020). Self-Reported Alcohol, Tobacco, and Cannabis Use during COVID-19  
514 Lockdown Measures: Results from a Web-Based Survey. *European Addiction Research*,  
515 26(6), 309–315. <https://doi.org/10.1159/000510822>
- 516 WHO ASSIST Working Group (2002). The Alcohol, Smoking and Substance Involvement  
517 Screening Test (ASSIST): Development, reliability and feasibility. *Addiction*, 97(9), 1183–  
518 1194. <https://doi.org/10.1046/j.1360-0443.2002.00185.x>
- 519 Wilkinson, S. T., Stefanovics, E., & Rosenheck, R. A. (2015). Marijuana use is associated with  
520 worse outcomes in symptom severity and violent behavior in patients with posttraumatic  
521 stress disorder. *The Journal of Clinical Psychiatry*, 76(9), 1174–1180.  
522 <https://doi.org/10.4088/JCP.14m09475>
- 523 World Health Organization (1994). Lexicon of alcohol and drug terms. In W. H. Organization  
524 (Ed.), *Lexicon of alcohol and drug terms*. Retrieved from  
525 <https://pesquisa.bvsalud.org/portal/resource/pt/who-39461>
- 526 World Health Organization (2018). Global status report on alcohol and health 2018. Retrieved  
527 from <https://www.who.int/publications/i/item/9789241565639>
- 528 World Health Organization - (2022). Alcohol. Retrieved from Available from: URL:  
529 <https://www.who.int/es/news-room/fact-sheets/detail/alcohol>.
